# Supplementary material for: Amelioration of colitis progression by ginseng-derived exosome-like nanoparticles through suppression of inflammatory cytokines
Source: PubMed Central journal article supplement — J Ginseng Res. 2023 Jan 7;47(5):627–37. doi: 10.1016/j.jgr.2023.01.004 (PMC10499592; doi:10.1016/j.jgr.2023.01.004), 2023-01-07
Supplement: mmc2.pdf [file mmc2.pdf]

# 复旦大学药学院实验动物伦理委员会

## 研究项目伦理审批件

伦药批第 (2021-07-YJ-JZS-90) 号

|                         |                      |                                                                                     |          |       |       |
|-------------------------|----------------------|-------------------------------------------------------------------------------------|----------|-------|-------|
| 项目名称                    | 人参衍生外泌体样纳米颗粒改善结肠炎研究  |                                                                                     |          |       |       |
| 项目类别                    | 基础____ 临床____ 药物_√_  |                                                                                     |          |       |       |
| 项目来源                    | 国家自然科学基金; 上海高峰学科建设项目 |                                                                                     |          |       |       |
| 申办单位                    | 复旦大学药学院              |                                                                                     |          | 单位负责人 | 李聪    |
| 研究部门                    | 药剂学系                 | 项目负责人                                                                               | KIM JISU | 职 称   | 博后研究员 |
| 伦理审查意见                  |                      |                                                                                     |          |       |       |
| △ 同意                    |                      |                                                                                     |          | √     |       |
| △ 修改后同意                 |                      |                                                                                     |          |       |       |
| △ 不同意 (项目终止或暂停)         |                      |                                                                                     |          |       |       |
| 审批意见                    |                      |                                                                                     |          |       |       |
| 该项目方案已通过实验动物伦理审查, 同意实施。 |                      |                                                                                     |          |       |       |
| 主任委员 (签名)               |                      |  |          |       |       |
|                         |                      | 复旦大学药学院实验动物伦理委员会<br>(盖章)                                                            |          |       |       |
|                         |                      | 2021 年 7 月 19 日                                                                     |          |       |       |
